# Supplementary material for: Early results from an Egyptian transcatheter aortic valve registry (Egy-TVR)
Source: PubMed Central journal article supplement (PMC8292463; doi:10.1186/s43044-021-00189-y), 2021-07-20
Supplement: 43044_2021_189_MOESM1_ESM.pdf [file 43044_2021_189_MOESM1_ESM.pdf]

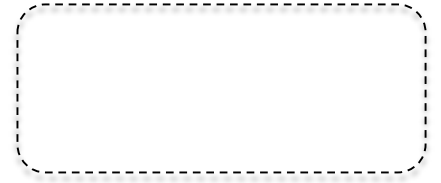

## Transcatheter Heart Valve Program

### Pre-procedure data

#### Personal Data

|                |                                                                                                                                   |          |                |
|----------------|-----------------------------------------------------------------------------------------------------------------------------------|----------|----------------|
| Name           |                                                                                                                                   | MRN      |                |
| DOB            | / /                                                                                                                               | Age      |                |
| Gender         | <input type="checkbox"/> Male <input type="checkbox"/> Female                                                                     | Hometown |                |
| Weight         | kg                                                                                                                                | Height   | m              |
| BMI            | kg/m <sup>2</sup>                                                                                                                 | BSA      | m <sup>2</sup> |
| Marital status | <input type="checkbox"/> Single <input type="checkbox"/> Married <input type="checkbox"/> Divorced <input type="checkbox"/> Widow |          |                |
| Occupation     |                                                                                                                                   |          |                |
| Phone 1        |                                                                                                                                   | Phone 2  |                |

## Medical history and comorbidities

- Critical preoperative state  No  Yes
- Angina  No  Yes  
CCS class  I  II  III  IV
- SOB  No  Yes  
NYHA class  I  II  III  IV
- Katz Index \_\_\_ / 6
- CSHA Score  1 = Very fit: robust, active, energetic, well motivated & fit; these people commonly exercise regularly & are in the most fit group for their age.  
 2 = Well: without active disease, but less fit than people in category 1  
 3 = Well, with treated comorbid disease: disease symptoms are well controlled compared with those in category 4  
 4 = Apparently vulnerable: although not frankly dependent, these people commonly complain of being "slowed up" or have disease symptoms  
 5 = Mildly frail: with limited dependence on others for instrumental activities of daily living  
 6 = Moderately frail: help is needed both with instrumental and non-instrumental activities of daily living  
 7 = Severely frail: completely dependent on others for the activities of daily living, or terminally ill
- DM  No  
 Yes (dietary control)  Yes (oral Rx)  
 Yes (insulin)  Yes (newly diagnosed)
- HTN  No  Yes
- Smoking  Never smoked  Ex-smoker  Current smoker
- Creatinine: \_\_\_\_\_ mg/dL CrCl: \_\_\_\_\_ ml/min/1.73m<sup>2</sup>
- On Dialysis  No  Yes
- Previous MI  No  MI <6 hours  MI 6-24 hours  
 MI 1-30 days  MI 31-90 days  MI >90 days



ECG

- Sinus       Afib/flutter       1<sup>st</sup> AVB       RBBB       LBBB
- CHB       Paced rhythm       VF or sustained VT
- Other abnormal rhythm [specify: \_\_\_\_\_ ]
- Other abnormal conduction [specify: \_\_\_\_\_ ]

**Notes**

## Heart Valve Team Meeting

Date:

Attended by:

| STS PROM:                            |          | EuroSCORE II:     |                 |                                                 |
|--------------------------------------|----------|-------------------|-----------------|-------------------------------------------------|
|                                      | Low Risk | Intermediate Risk | High Risk       | Prohibitive Risk                                |
| <b>STS Score</b>                     | <4 %     | 4-8 %             | >8 %            | Risk of death or major morbidity >50% at 1-year |
| <b>Katz Index</b>                    | 6/6      | 5/6               | 0-4/6           |                                                 |
| <b>Major Organ System Compromise</b> | None     | 1 organ system    | 2 organ systems | ≥3 organ systems                                |
| <b>Procedure Specific Impediment</b> | None     | Possible          | Possible        | Severe                                          |

### Katz Index of Independence in Activities of Daily Living

- Feeding, bathing, dressing, toileting, mobility, and continence

### Major Organ System Compromise

- Cardiac: Severe LV systolic dysfunction, severe RV dysfunction, severe pulmonary HTN
- Pulmonary: FEV1 <50% of predicted, FVC <1.5 L
- Kidney: Estimated GFR < 60 ml/min/1.73m<sup>2</sup>
- Liver: Any history of cirrhosis, variceal bleeding, any history of encephalopathy, INR >1.5 (in the absence of VKA use), bilirubin >2 mg/dL
- CNS: Dementia, Alzheimer's disease, Parkinson's disease, CVA with residual physical limitation
- GIT: Inflammatory bowel disease, serum albumin < 3.0 mg/dL
- Cancer: Active malignancy

### Procedure-specific impediment

- Heavily calcified ascending aorta
- Chest deformity
- Patent arterial graft adherent to posterior chest wall
- Radiation damage

Overall estimated risk of SAVR     Low     Intermediate     High     Prohibitive

MDT Decision

## Echocardiography

|                                     |                                                                                                                                      |                                      |                                                                                                                                                                                                                                        |
|-------------------------------------|--------------------------------------------------------------------------------------------------------------------------------------|--------------------------------------|----------------------------------------------------------------------------------------------------------------------------------------------------------------------------------------------------------------------------------------|
| LVEDD                               |                                                                                                                                      | RVD <sub>1</sub>                     |                                                                                                                                                                                                                                        |
| LVESD                               |                                                                                                                                      | RVD <sub>2</sub>                     |                                                                                                                                                                                                                                        |
| FS                                  |                                                                                                                                      | RVD <sub>3</sub>                     |                                                                                                                                                                                                                                        |
| EF                                  |                                                                                                                                      | TAPSE                                |                                                                                                                                                                                                                                        |
| SWT "diastole"                      |                                                                                                                                      | Estimated PASP                       |                                                                                                                                                                                                                                        |
| PWT "diastole"                      |                                                                                                                                      | TR severity                          |                                                                                                                                                                                                                                        |
| LA AP diameter                      |                                                                                                                                      | Stroke volume                        |                                                                                                                                                                                                                                        |
| LA volume                           |                                                                                                                                      | Indexed stroke volume                |                                                                                                                                                                                                                                        |
| LA volume index                     |                                                                                                                                      | Cardiac index                        |                                                                                                                                                                                                                                        |
| RWMA                                |                                                                                                                                      |                                      |                                                                                                                                                                                                                                        |
| Mitral Regurgitation                | <input type="checkbox"/> No<br><input type="checkbox"/> Mild<br><input type="checkbox"/> Moderate<br><input type="checkbox"/> Severe | <b>Aortic Regurgitation</b>          | <input type="checkbox"/> No<br><input type="checkbox"/> Mild<br><input type="checkbox"/> Moderate<br><input type="checkbox"/> Severe                                                                                                   |
| <b>Aortic valve/root dimensions</b> |                                                                                                                                      | <b>Aortic valve disease etiology</b> | <input type="checkbox"/> Congenital<br><input type="checkbox"/> Degenerative<br><input type="checkbox"/> Rheumatic<br><input type="checkbox"/> Bioprosthetic<br><input type="checkbox"/> Previous IE<br><input type="checkbox"/> Other |
| - Aortic Annulus                    | _____ mm                                                                                                                             |                                      |                                                                                                                                                                                                                                        |
| - Sinuses of Valsalva               | _____ mm                                                                                                                             |                                      |                                                                                                                                                                                                                                        |
| - STJ                               | _____ mm                                                                                                                             |                                      |                                                                                                                                                                                                                                        |
| - Ascending aorta                   | _____ mm                                                                                                                             |                                      |                                                                                                                                                                                                                                        |
| <b>AV peak gradient</b>             |                                                                                                                                      | <b>Cuspidity</b>                     | <input type="checkbox"/> Bicuspid                                                                                                                                                                                                      |
| <b>AV mean gradient</b>             |                                                                                                                                      |                                      | <input type="checkbox"/> Tricuspid                                                                                                                                                                                                     |
| <b>AV area</b>                      |                                                                                                                                      | <b>Indexed AV area</b>               |                                                                                                                                                                                                                                        |
| <b>Final Diagnosis and Notes</b>    |                                                                                                                                      |                                      |                                                                                                                                                                                                                                        |

# TAVI - CT ASSESSMENT FORM

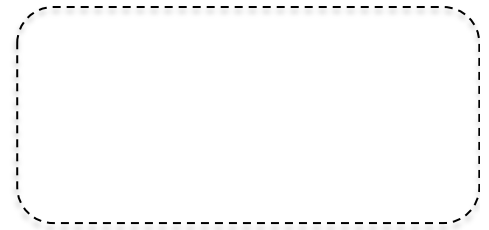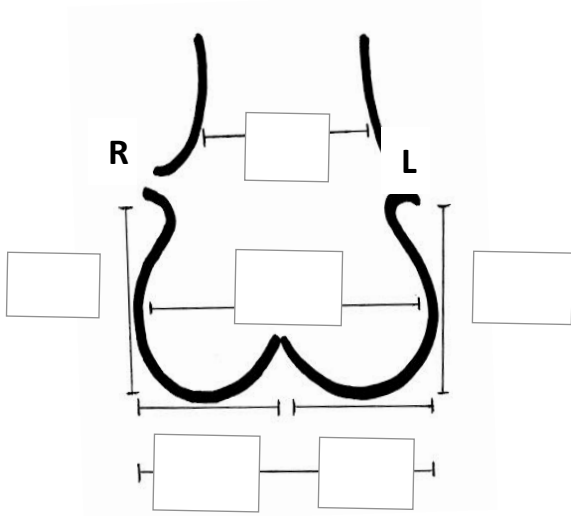

|                    |  |
|--------------------|--|
| Optimal Projection |  |
| Valve size         |  |
| Calcium score      |  |

### Coronary Artery Disease

- LM  %
- Prox LAD  %
- Mid LAD  %
- Prox Cx  %
- Mid Cx  %
- Prox RCA  %
- Mid RCA  %

|              |                 |
|--------------|-----------------|
| Area         | cm <sup>3</sup> |
| Perimeter    | mm              |
| Min Diameter | mm              |
| Max Diameter | mm              |
| AD Diameter  | mm              |
| PD Diameter  | mm              |

|                    |                                                                                                                           |
|--------------------|---------------------------------------------------------------------------------------------------------------------------|
| Apical Thrombus    | <input type="checkbox"/> Yes <input type="checkbox"/> No                                                                  |
| LVOT calcification | <input type="checkbox"/> No <input type="checkbox"/> Mild<br><input type="checkbox"/> Mod <input type="checkbox"/> Severe |
| Porcelain aorta    | <input type="checkbox"/> Yes <input type="checkbox"/> No                                                                  |
| Shallow sinuses    | <input type="checkbox"/> Yes <input type="checkbox"/> No                                                                  |

### Notes

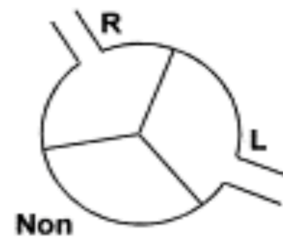

## Cardiac Catheterization

| Pressures                    |            |                                                          |
|------------------------------|------------|----------------------------------------------------------|
| AO                           |            |                                                          |
| LV                           |            |                                                          |
| Peak-to-peak gradient        |            |                                                          |
| Coronary angiography +/- PCI |            |                                                          |
| Vessel                       | % Stenosis | PCI                                                      |
| LMS                          |            | <input type="checkbox"/> No <input type="checkbox"/> Yes |
| Proximal LAD                 |            | <input type="checkbox"/> No <input type="checkbox"/> Yes |
| Mid LAD                      |            | <input type="checkbox"/> No <input type="checkbox"/> Yes |
| Distal LAD                   |            | <input type="checkbox"/> No <input type="checkbox"/> Yes |
| Prox LCx                     |            | <input type="checkbox"/> No <input type="checkbox"/> Yes |
| Mid LCx                      |            | <input type="checkbox"/> No <input type="checkbox"/> Yes |
| Distal LCx                   |            | <input type="checkbox"/> No <input type="checkbox"/> Yes |
| Proximal RCA                 |            | <input type="checkbox"/> No <input type="checkbox"/> Yes |
| Mid RCA                      |            | <input type="checkbox"/> No <input type="checkbox"/> Yes |
| Distal RCA                   |            | <input type="checkbox"/> No <input type="checkbox"/> Yes |

**Notes**



## Pre-procedure laboratory investigations

|                 |  |                      |  |
|-----------------|--|----------------------|--|
| CBC             |  | Liver function tests |  |
| Plt             |  | AST                  |  |
| WCC             |  | ALT                  |  |
| Plt             |  | Albumin              |  |
| Renal function  |  | Proteins             |  |
| Urea            |  | T.Bilirubin          |  |
| Creatinine      |  | D.Bilirubin          |  |
| Uric acid       |  | Alkaline Phosph      |  |
| eGFR            |  | Coagulation profile  |  |
| Electrolytes    |  | INR                  |  |
| Na              |  | PC                   |  |
| K               |  | PTT                  |  |
| Mg              |  | Iron studies         |  |
| Ca              |  | Ferritin             |  |
| Thyroid profile |  | Iron                 |  |
| TSH             |  | TIBC                 |  |
| FT3             |  | Lipid profile        |  |
| FT4             |  | Total cholesterol    |  |
| Blood glucose   |  | LDL                  |  |
| FBS             |  | HDL                  |  |
| HbA1C           |  | Triglycerides        |  |
|                 |  |                      |  |



## Procedure Outcome and Complications

Valve successfully  
deployed

No  Yes

If no, reason:

- Access site complication  Failure to negotiate iliac vessels or aorta  Unable to cross aortic arch  Unable to cross aortic valve
- Aborted due to vessel perforation/dissection
- Aborted due to anticipated coronary obstruction
- Aborted for other reason [specify: \_\_\_\_\_]
- Not deployed for technical reason
- Other failure to deploy [specify: \_\_\_\_\_]

Post deployment AV peak  
gradient

\_\_\_\_\_ mmHg

Post deployment AV mean  
gradient

\_\_\_\_\_ mmHg

AR at end of procedure

None  Mild  Moderate  Severe  Unknown

AR evaluated by

Angiograph  TEE  TTE

Valve malpositioning

None  Valve migration  Valve embolization

Ectopic valve deployment

Bailout valve-in-valve

No  emergency during index procedure

Non-emergency during index procedure for suboptimal result

Post-implantation balloon  
dilatation

No  Yes  Not applicable

Further valve  
Intervention (not during  
index procedure but before  
discharge

None  TAVI  Surgical AVR  BAV

Intervention on another valve  Other [specify:  
\_\_\_\_\_]

Tamponade during/post  
procedure

No  Yes (requiring surgical intervention)

Yes (requiring percutaneous intervention)

Major apical cannulation  
complications

No  Yes

|                                            |                                             |                                                                                                                                                                                                                                           |                                                  |                                  |
|--------------------------------------------|---------------------------------------------|-------------------------------------------------------------------------------------------------------------------------------------------------------------------------------------------------------------------------------------------|--------------------------------------------------|----------------------------------|
| Conversion to full sternotomy              | <input type="checkbox"/> No                 | <input type="checkbox"/> Yes                                                                                                                                                                                                              |                                                  |                                  |
| Bailout PCI                                | <input type="checkbox"/> No                 | <input type="checkbox"/> Yes                                                                                                                                                                                                              |                                                  |                                  |
| Periprocedural MI                          | <input type="checkbox"/> No                 | <input type="checkbox"/> Yes                                                                                                                                                                                                              |                                                  |                                  |
| Permanent pacing                           | <input type="checkbox"/> No                 | <input type="checkbox"/> Yes-preprocedure therapeutic (including distant past)<br><input type="checkbox"/> Yes - pre-procedure prophylactic<br><input type="checkbox"/> Yes - per-procedure <input type="checkbox"/> Yes - post-procedure |                                                  |                                  |
| CVA                                        | <input type="checkbox"/> No                 | <input type="checkbox"/> Yes - Ischemic                                                                                                                                                                                                   | <input type="checkbox"/> Yes - hemorrhagic       |                                  |
|                                            | <input type="checkbox"/> Yes - undetermined |                                                                                                                                                                                                                                           |                                                  |                                  |
| If yes, modified Rankin Score at 90 days   | _____                                       |                                                                                                                                                                                                                                           |                                                  |                                  |
| Vascular access site related complications | <input type="checkbox"/> No                 | <input type="checkbox"/> Major                                                                                                                                                                                                            | <input type="checkbox"/> Minor                   |                                  |
| Percutaneous closure device failure        | <input type="checkbox"/> No                 | <input type="checkbox"/> Yes                                                                                                                                                                                                              | <input type="checkbox"/> Not applicable          |                                  |
| Bleeding                                   | <input type="checkbox"/> No                 | <input type="checkbox"/> Yes – life threatening                                                                                                                                                                                           |                                                  |                                  |
|                                            | <input type="checkbox"/> Yes – major        | <input type="checkbox"/> Yes – minor                                                                                                                                                                                                      |                                                  |                                  |
| No of units of blood transfused            | _____                                       |                                                                                                                                                                                                                                           |                                                  |                                  |
| AKI within 7 days of procedure             | <input type="checkbox"/> No AKI             | <input type="checkbox"/> Stage 1                                                                                                                                                                                                          | <input type="checkbox"/> Stage 2                 | <input type="checkbox"/> Stage 3 |
|                                            | <input type="checkbox"/> Unknown            |                                                                                                                                                                                                                                           |                                                  |                                  |
| New RRT up to discharge                    | <input type="checkbox"/> No                 | <input type="checkbox"/> Yes                                                                                                                                                                                                              |                                                  |                                  |
| Death to hospital discharge                | <input type="checkbox"/> No                 | <input type="checkbox"/> Yes                                                                                                                                                                                                              |                                                  |                                  |
| Date of discharge or death                 | /      /                                    |                                                                                                                                                                                                                                           |                                                  |                                  |
| Drugs at discharge - antithrombotic        | <input type="checkbox"/> None               | <input type="checkbox"/> Warfarin                                                                                                                                                                                                         | <input type="checkbox"/> Dabigatran              |                                  |
|                                            | <input type="checkbox"/> Rivaroxaban        |                                                                                                                                                                                                                                           |                                                  |                                  |
|                                            | <input type="checkbox"/> Apixaban           | <input type="checkbox"/> Other [specify: _____ ]                                                                                                                                                                                          |                                                  |                                  |
| Drugs at discharge - antiplatelet          | <input type="checkbox"/> None               | <input type="checkbox"/> Aspirin                                                                                                                                                                                                          | <input type="checkbox"/> Clopidogrel             |                                  |
|                                            | <input type="checkbox"/> Prasugrel          | <input type="checkbox"/> Ticagrelor                                                                                                                                                                                                       | <input type="checkbox"/> Other [specify: _____ ] |                                  |

## Follow up

### Follow up at 1 year

Angina  No  Yes  
 CCS class  I  II  III  IV

SOB  No  Yes  
 NYHA class  I  II  III  IV

### Follow up at 3 years

Angina  No  Yes  
 CCS class  I  II  III  IV

SOB  No  Yes  
 NYHA class  I  II  III  IV

Late valve stenosis  No  Yes

Date of Dx of significant stenosis / /

Late intrinsic valve regurgitation (not paravalvular)  No  Yes

Date of Dx of clinically significant regurgitation / /

Valve failure mode  Stent creep  Pannus  Calcification  
 Support structure deformation  Prosthesis-patient mismatch  
 Endocarditis  Valve thrombosis  
 Native leaflet impeding prosthetic motion  malposition (too high/too low)  Leaflet wear/tear/perforation  Leaflet malcoaptation

Late paravalvular regurgitation  No  Yes – new  
 Yes – unchanged from existing  Yes – increased from existing  
 Yes – less than post-procedure

Date of Dx of clinically significant paravalvular regurgitation / /
